# Supplementary material for: Relationship between clinical course of nivolumab-related myositis and immune status in a patient with Hodgkin’s lymphoma after allogeneic hematopoietic stem cell transplantation
Source: Springer Nature journal article supplement (doi:10.1007/s12185-018-02584-9), 2019-01-02
Supplement: MOESM1 [file 16373356]

Peripheral blood samples were obtained from a healthy donor and a patient. Peripheral blood mononuclear cells (PBMCs) were isolated from the peripheral blood by performing Ficoll-Hypaque density-gradient centrifugation. The PBMCs were directly stained with a combination of the following antibodies: PE-conjugated anti-CD8 (BD Biosciences), anti-Foxp3 (e Bioscience), FITC-conjugated anti-CD4 (BD Biosciences), anti-CD45RA (BD Biosciences), anti-CD107a (BD Biosciences), anti-Granzyme B (BioLegend), PE-Cy7-conjugated anti-CD56 (BioLegend), anti-CD4 (BioLegend), anti- interferon-γ (BioLegend), anti-interleukin-2 (BioLegend), PerCP-Cy5.5-conjugated anti-CD3 (BD Biosciences), APC-conjugated programmed cell death (PD)-1 (BioLegend), anti-TNF-α (BioLegend), anti-CD56 (BioLegend), anti-interleukin-10 (BioLegend), and APC-Cy7-conjugated anti-CD3 (BioLegend). Cytokine production was detected by intracellular cytokine staining after stimulation with phorbol 12-myristate 13-acetate (25 ng/mL) and ionomycin (1 μg/mL) for 4.5 hours in the presence of protein transport inhibitor Golgi stop (BD Bioscience), using the BD Cytofix/Cytoperm Fixation/Permeabilization Kit. After washing, the cells were analyzed using a FACS Canto flow cytometer (BD Biosciences, San Jose, CA, USA) and FlowJo Version 10.2 software (TreeStar, Ashland, OR).
